# Supplementary material for: Novel ACE Inhibitory Peptides Derived from Simulated Gastrointestinal Digestion in Vitro of Sesame (Sesamum indicum L.) Protein and Molecular Docking Study
Source: PubMed Central journal article supplement (PMC7037947; doi:10.3390/ijms21031059), 2020-02-05
Supplement: ijms-21-01059-s001.pdf [file ijms-21-01059-s001.pdf]

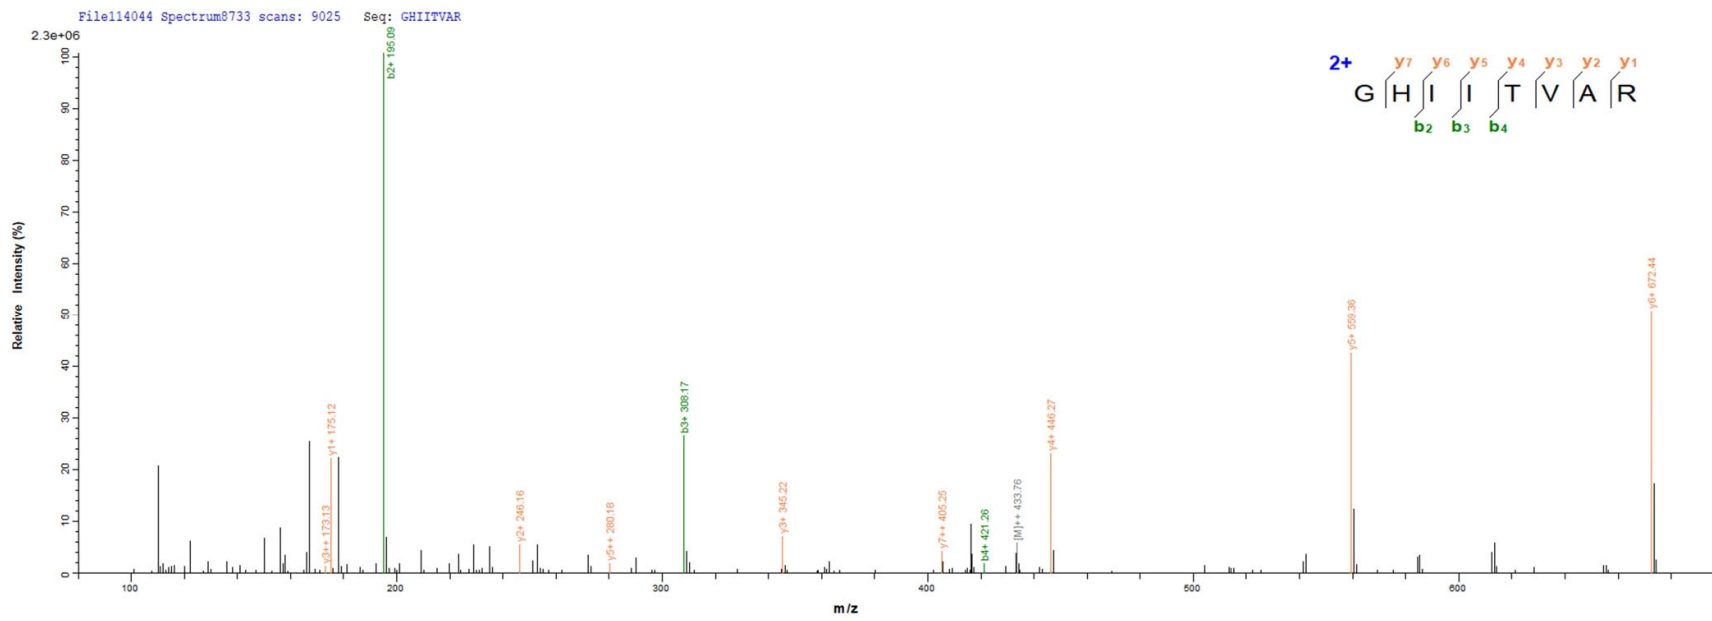

(a)

File114044 Spectrum22168 scans: 22907 Seq: IGGIGTVPVGR

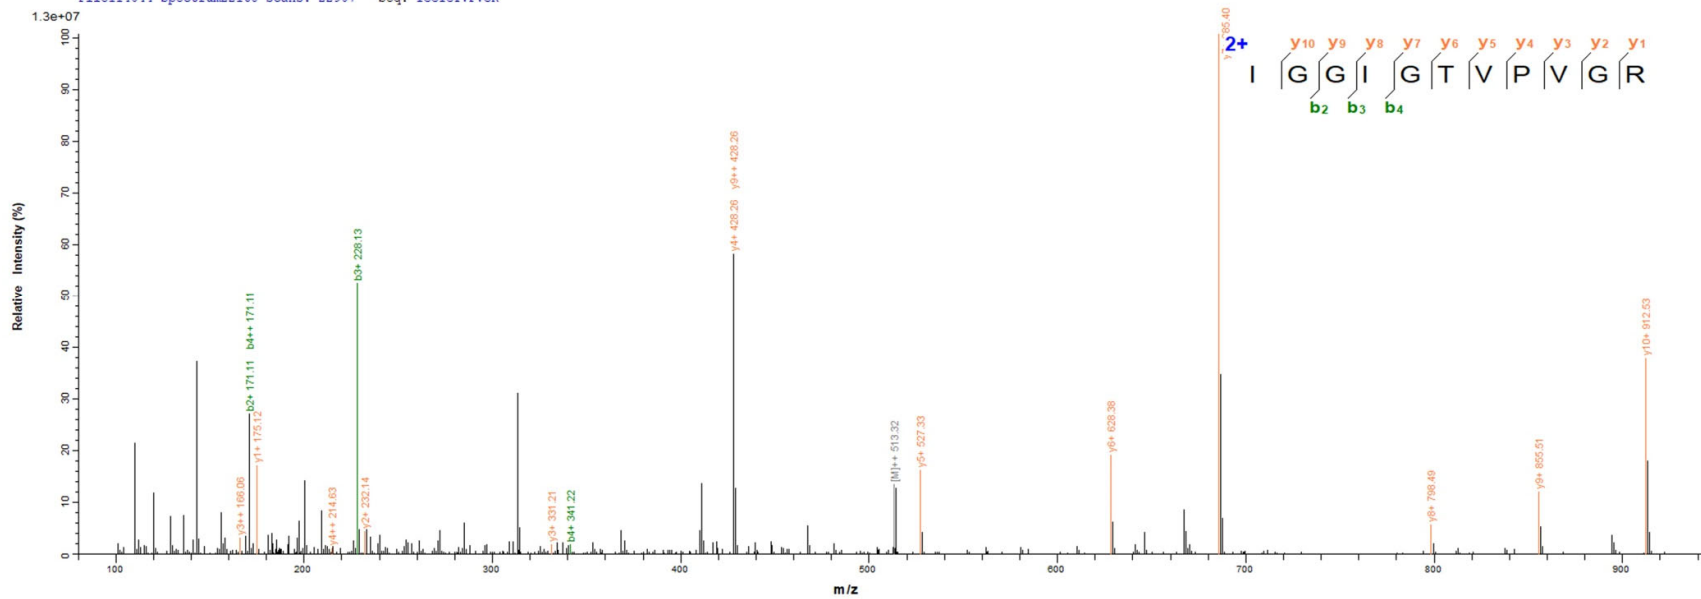

(b)

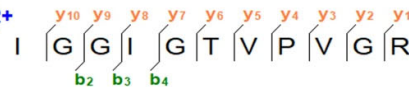

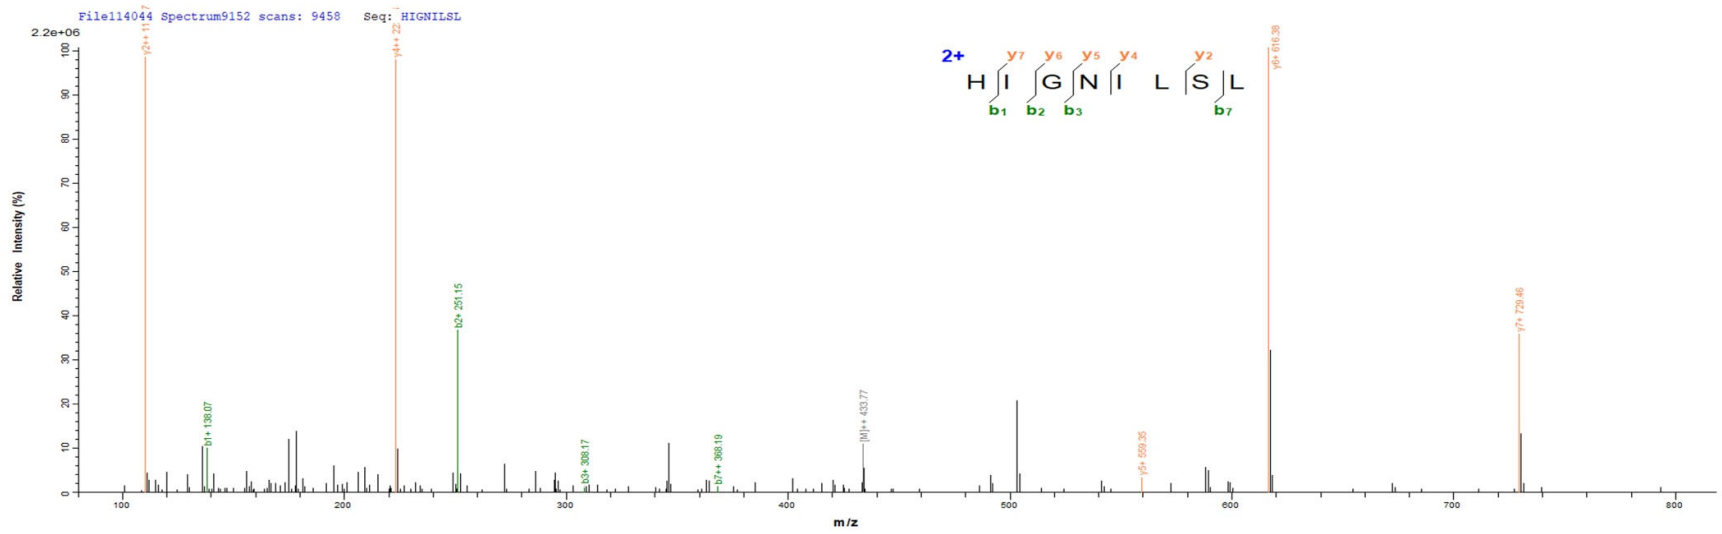

(c)

File114044 Spectrum29997 scans: 30997 Seq: FMPGVPGPIQR

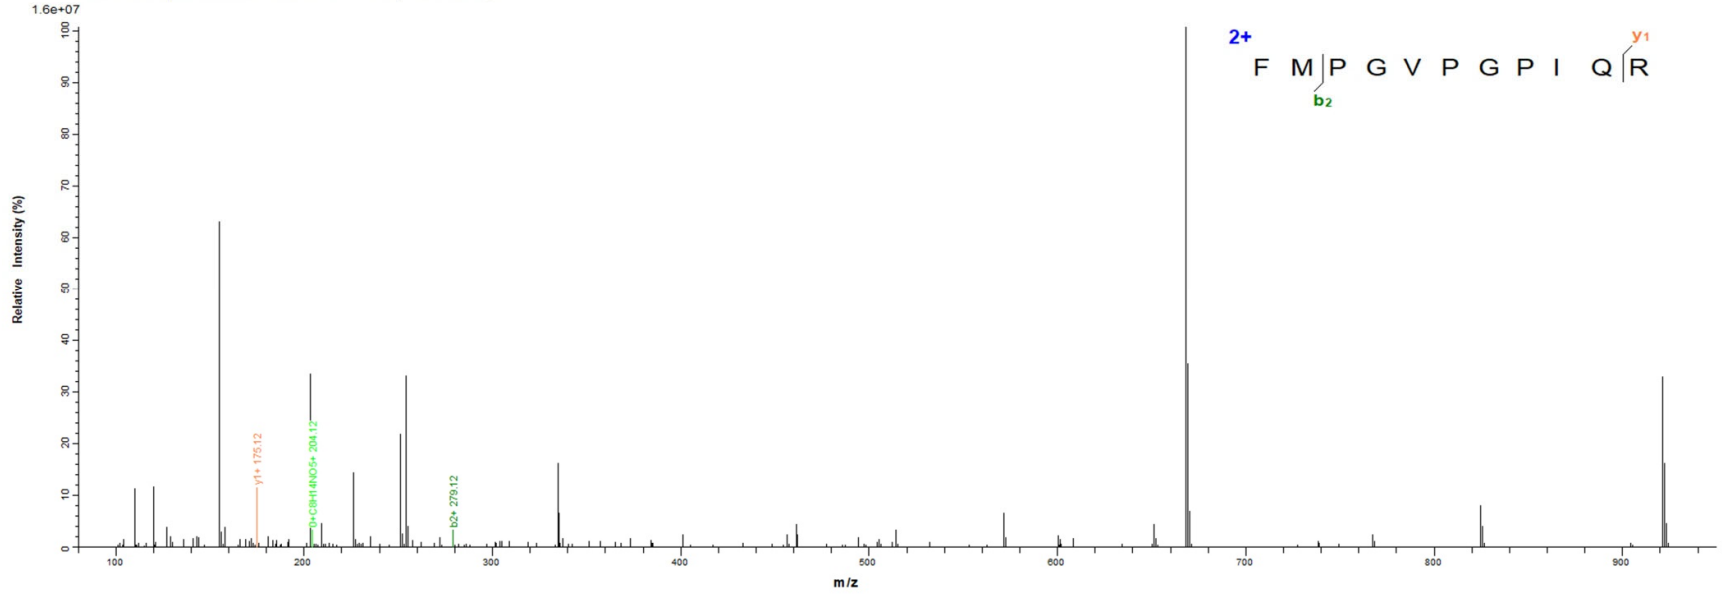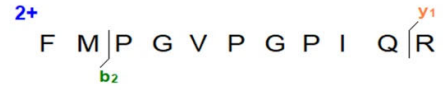

(d)

File114044 Spectrum8942 scans: 9241 Seq: FNYHPSR

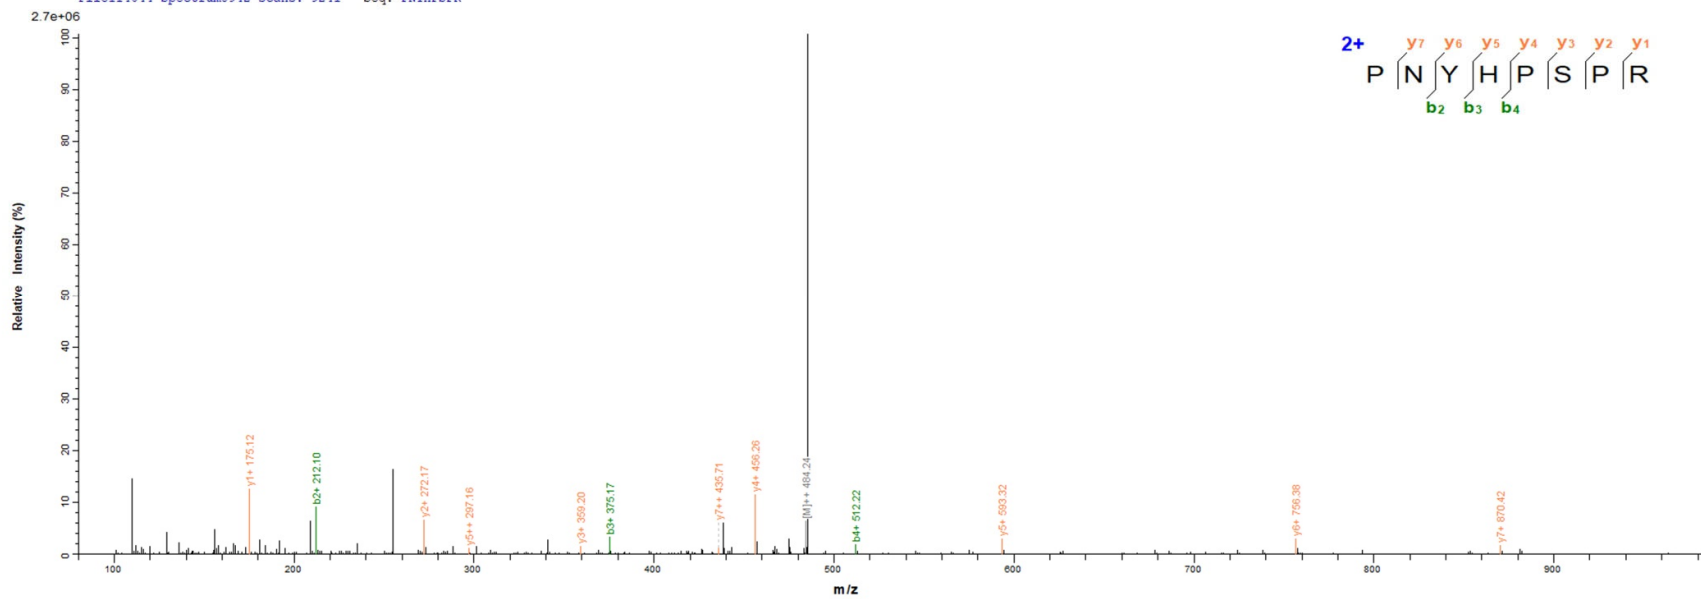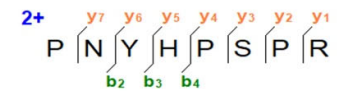

(e)

File114044 Spectrum26629 scans: 27517 Seq: AFPAGAAHW

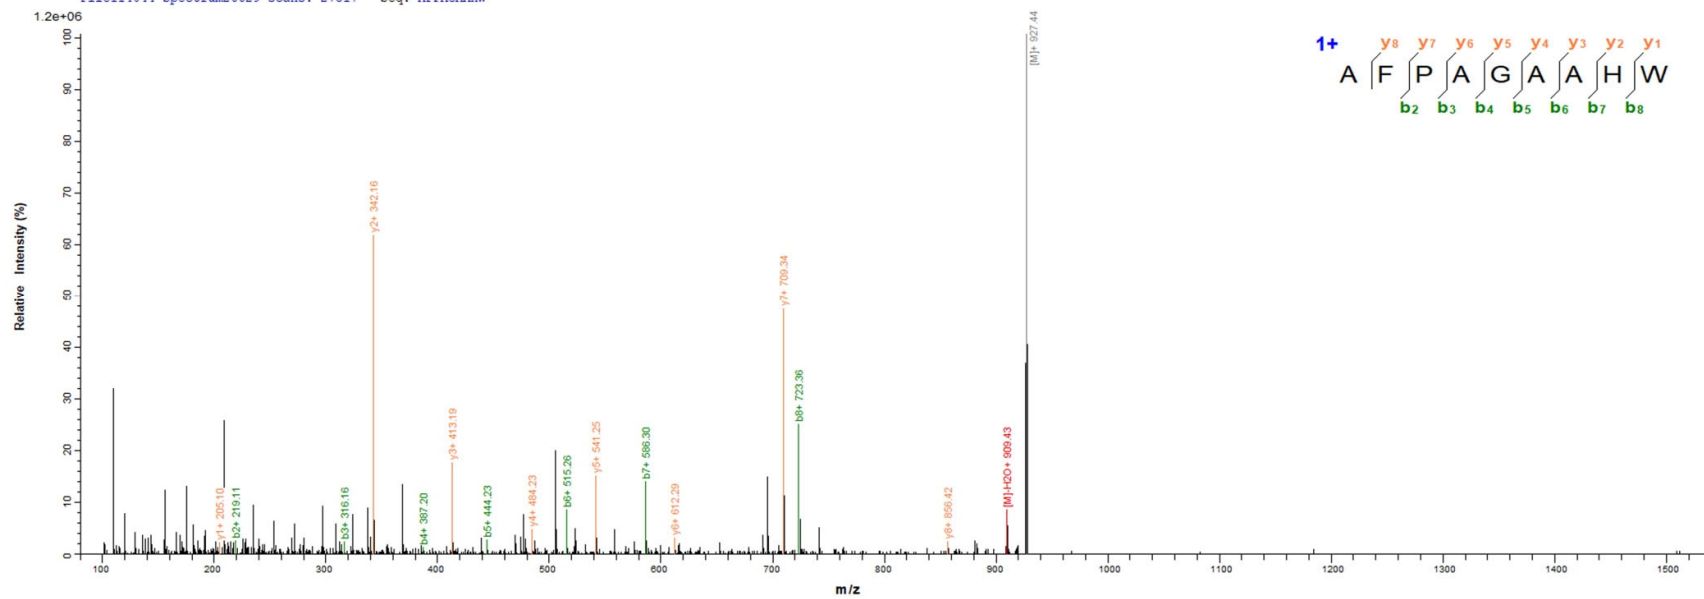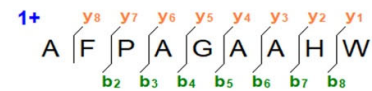

(f)

File114044 Spectrum9591 scans: 9911 Seq: HIITLGR

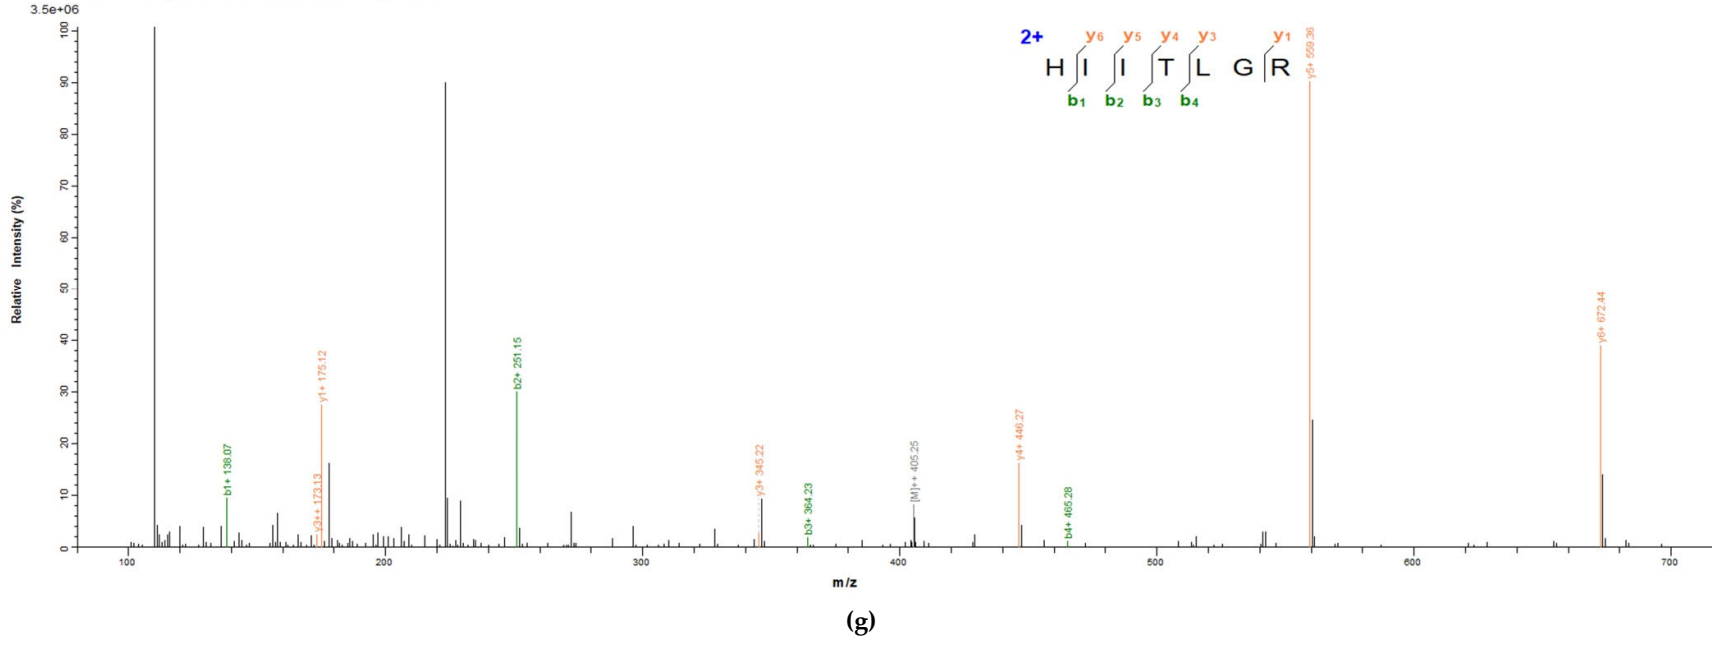

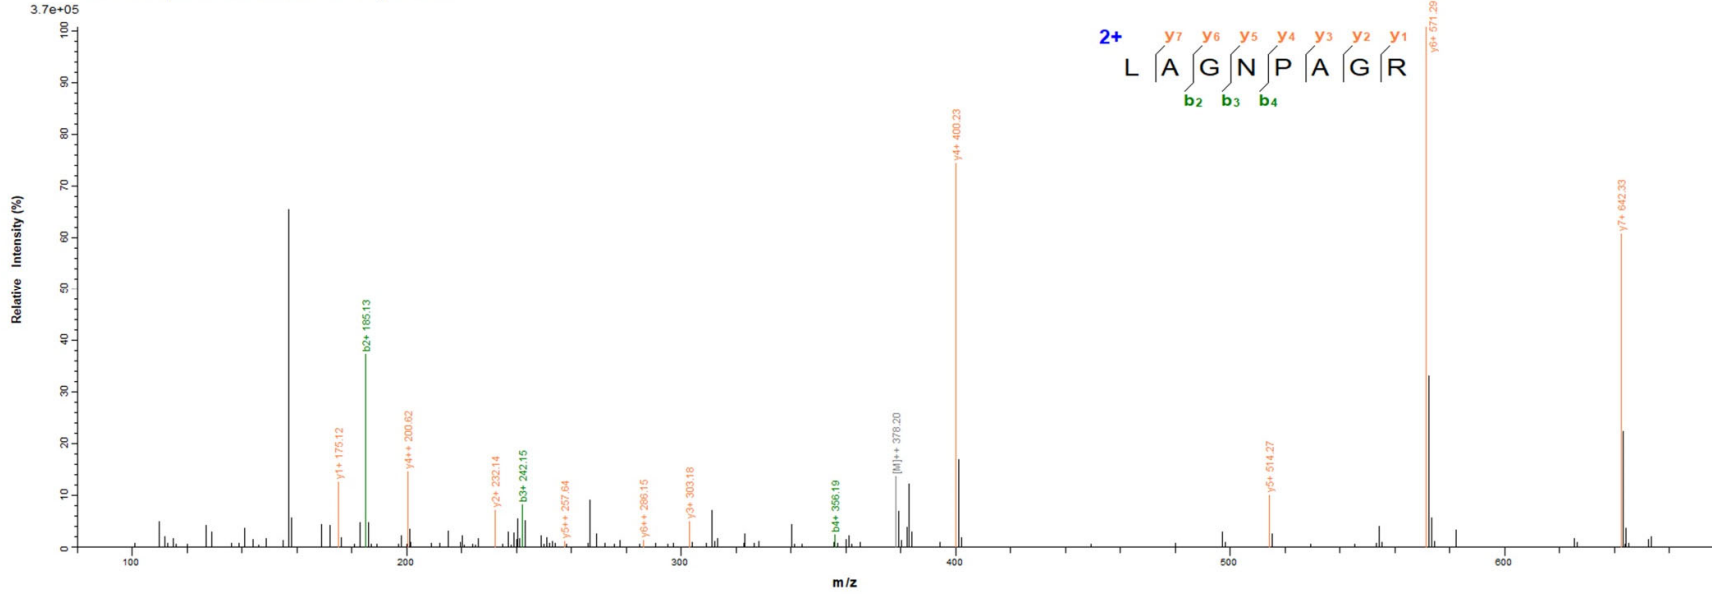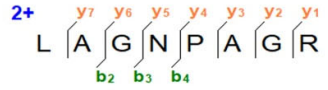

(h)



File114044 Spectrum51334 scans: 53047 Seq: MFGVGPPIQR

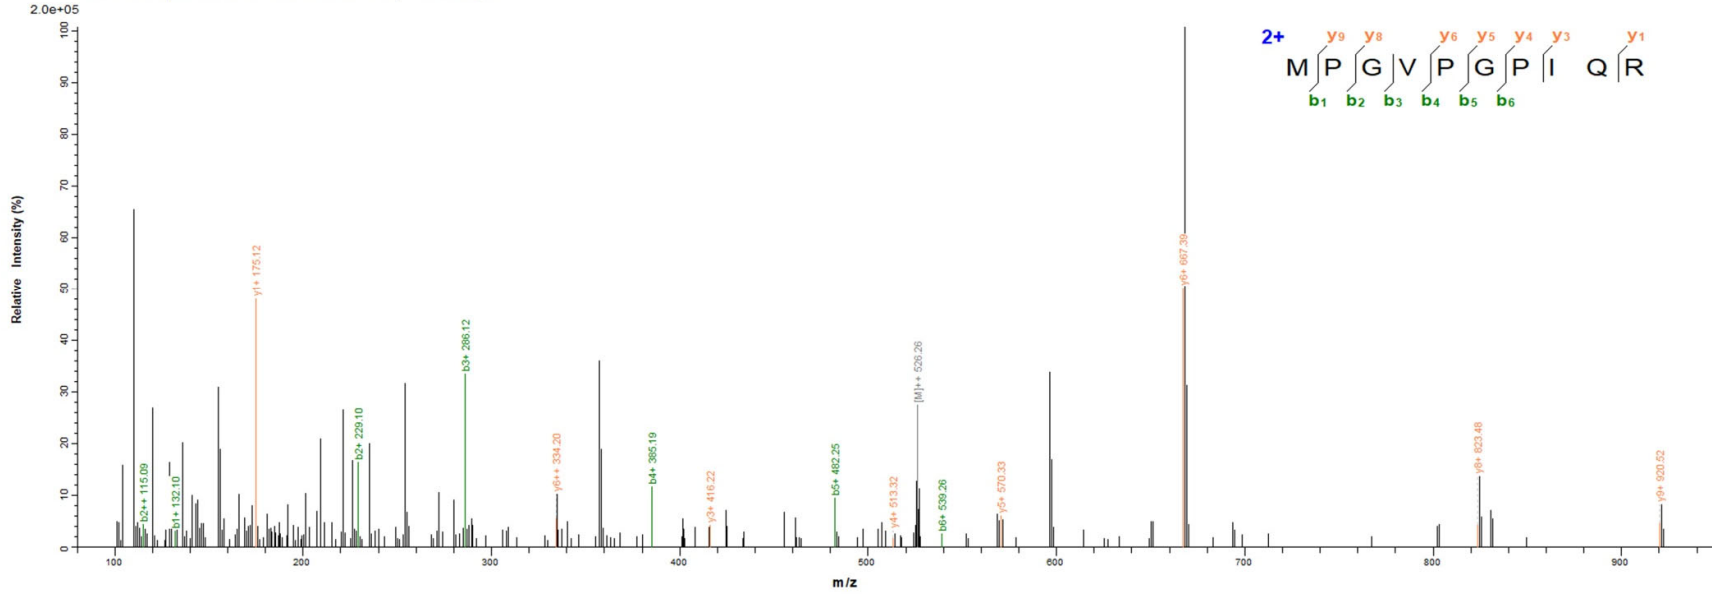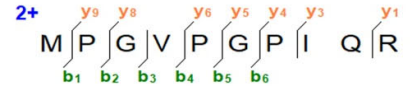

(i)

File114044 Spectrum16294 scans: 16838 Seq: AGALGDSVTVTR

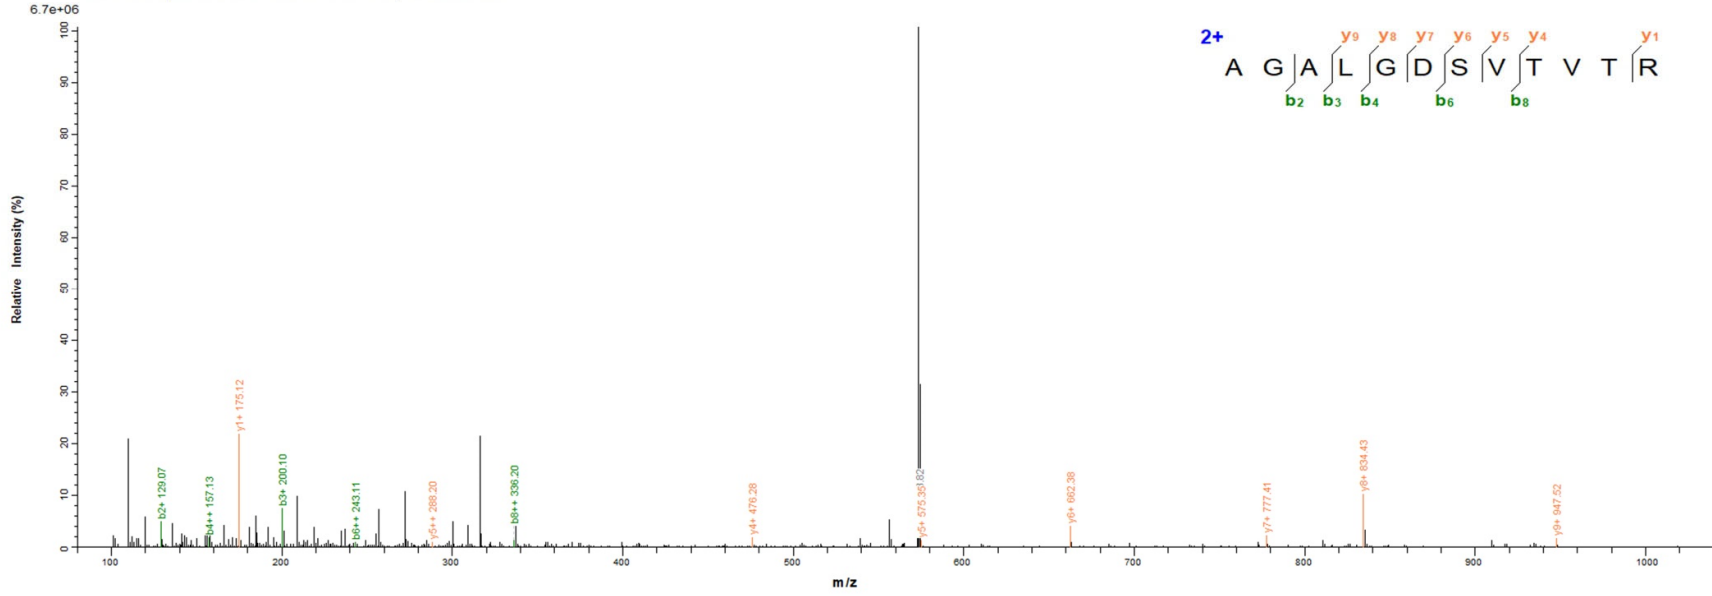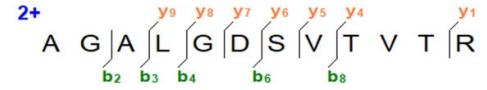

(j)

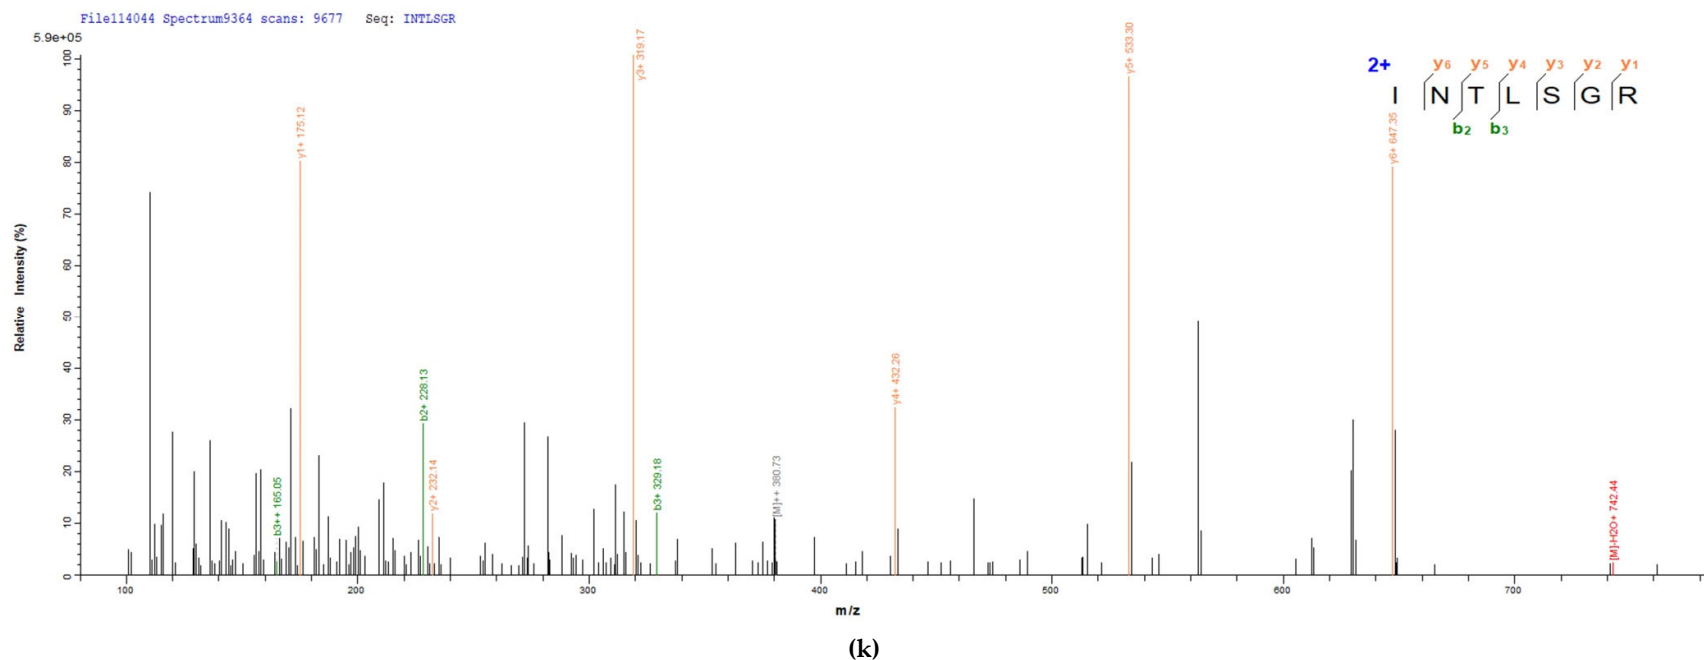

2 **Figure S1.** Identification of the molecular weight and amino acid sequence from peak 4. (a) MS/MS spectrum of GHITVAR. (b) MS/MS spectrum of IGGIGTVPVGR. (c)  
 3 MS/MS spectrum of HIGNILSL. (d) MS/MS spectrum of FMPGVPGPIQR. (e) MS/MS spectrum of PNYHPSPR. (f) MS/MS spectrum of AFPAGAAHW. (g) MS/MS  
 4 spectrum of HIITLGR. (h) MS/MS spectrum of LAGNPAGR. (i) MS/MS spectrum of MPGVPGPIQR. (j) MS/MS spectrum of AGALGDSVTVTR. (k) MS/MS spectrum of  
 5 INTLSGR.

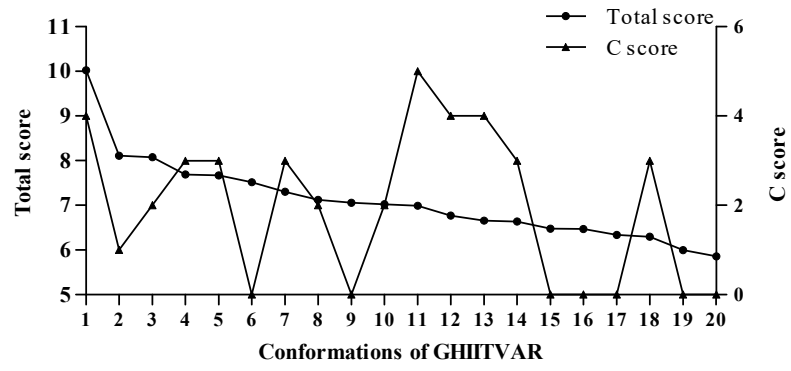

Figure S2. Total scores and C scores of conformations of GHIITVAR.

6  
7  
8

Table S1. Surflex-Dock scores (kcal/mol) of the other peptides.

| Peptide     | Total_score | Crash   | Polar   | D_score   | PMF_score | G_score   | Chem score | C score |
|-------------|-------------|---------|---------|-----------|-----------|-----------|------------|---------|
| INTLSGR     | 12.2544     | -7.2199 | 12.0071 | -317.9095 | -275.737  | -483.6159 | -35.7317   | 1       |
| LAGNPAGR    | 14.3901     | -5.604  | 10.4595 | -316.4394 | -209.338  | -527.4342 | -42.3209   | 1       |
| MPGVPGPIQR  | 12.5911     | -5.6723 | 6.0252  | -347.0212 | -220.822  | -649.0413 | -10.4718   | 2       |
| AFPAGAAHW   | 9.2034      | -4.679  | 4.4847  | -287.4604 | -283.761  | -507.8476 | -41.4304   | 1       |
| PNYHPSPR    | 10.0883     | -6.7967 | 5.6331  | -349.9793 | -308.285  | -674.6738 | -35.9565   | 2       |
| HIGNILSL    | 13.1644     | -4.6353 | 9.2204  | -307.7014 | -236.307  | -564.3041 | -45.3885   | 0       |
| FMPGVPGPIQR | 9.6726      | -7.723  | 7.2321  | -371.4869 | -263.845  | -628.7991 | -19.6976   | 3       |
| IGGIGTVPVGR | 11.964      | -7.5337 | 8.7111  | -363.7118 | -269.274  | -674.8707 | -52.8792   | 1       |
